# Supplementary material for: YAP and TAZ in Vascular Smooth Muscle Confer Protection Against Hypertensive Vasculopathy
Source: PubMed Central journal article supplement (PMC8939708; doi:10.1161/atvbaha.121.317365), 2022-02-24
Supplement: atv-42-428-s001.pdf [file atv-42-428-s001.pdf]

# "SUPPLEMENTAL MATERIALS"

## **YAP and TAZ in vascular smooth muscle confer protection against hypertensive vasculopathy**

Fatima Daoud<sup>1</sup>, Marycarmen Arévalo Martínez<sup>1</sup>, Johan Holmberg<sup>1</sup>, Azra Alajbegovic<sup>1</sup>, Naserin Ali<sup>2</sup>, Catarina Rippe<sup>1</sup>, Karl Swärd<sup>1</sup> and Sebastian Albinsson<sup>1\*</sup>

<sup>1</sup>Department of Experimental Medical Science, Lund University, Sweden.

<sup>2</sup>Department of Clinical Sciences Lund, Orthopaedics, Clinical Epidemiology Unit, Lund University, Sweden

\*Corresponding author:

Department of Experimental Medical Science, Lund University, BMC D12, SE-221 84 Lund, Sweden.

E-mail address: [sebastian.albinsson@med.lu.se](mailto:sebastian.albinsson@med.lu.se).

Phone: +46-46-2220678

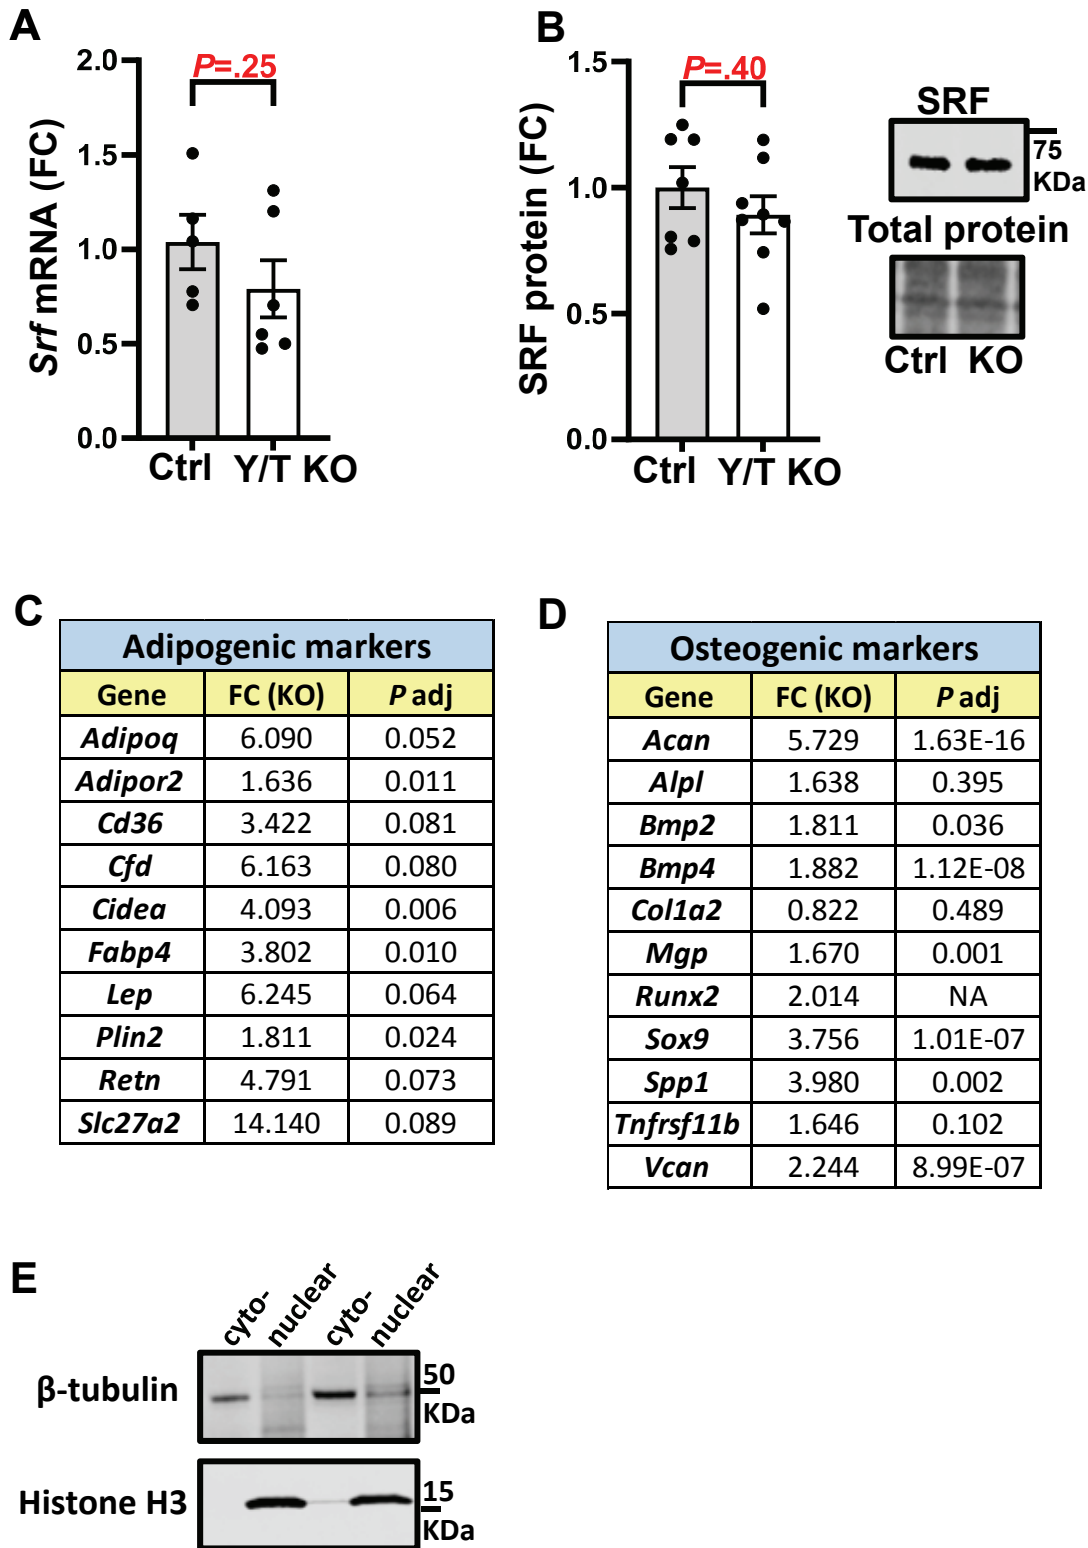

**Figure S1. Expression of selected transcripts.**

(A) *Srf* mRNA level normalized to *Gapdh*. (B) Quantification of western blot analysis of SRF to the left and a representative blot to the right. Protein level was normalized to total protein stain. (C) Selection of some adipogenic markers from RNA sequencing data with their fold changes in Y/T KO (FC KO) and adjusted P value. (D) Selection of some osteogenic markers from RNA sequencing data with their fold changes in Y/T KO (FC KO) and adjusted P value. (E) representative blot of nuclear and cytoplasm separation;  $\beta$ - tubulin as cytoplasmic marker and Histone H3 as nuclear marker.

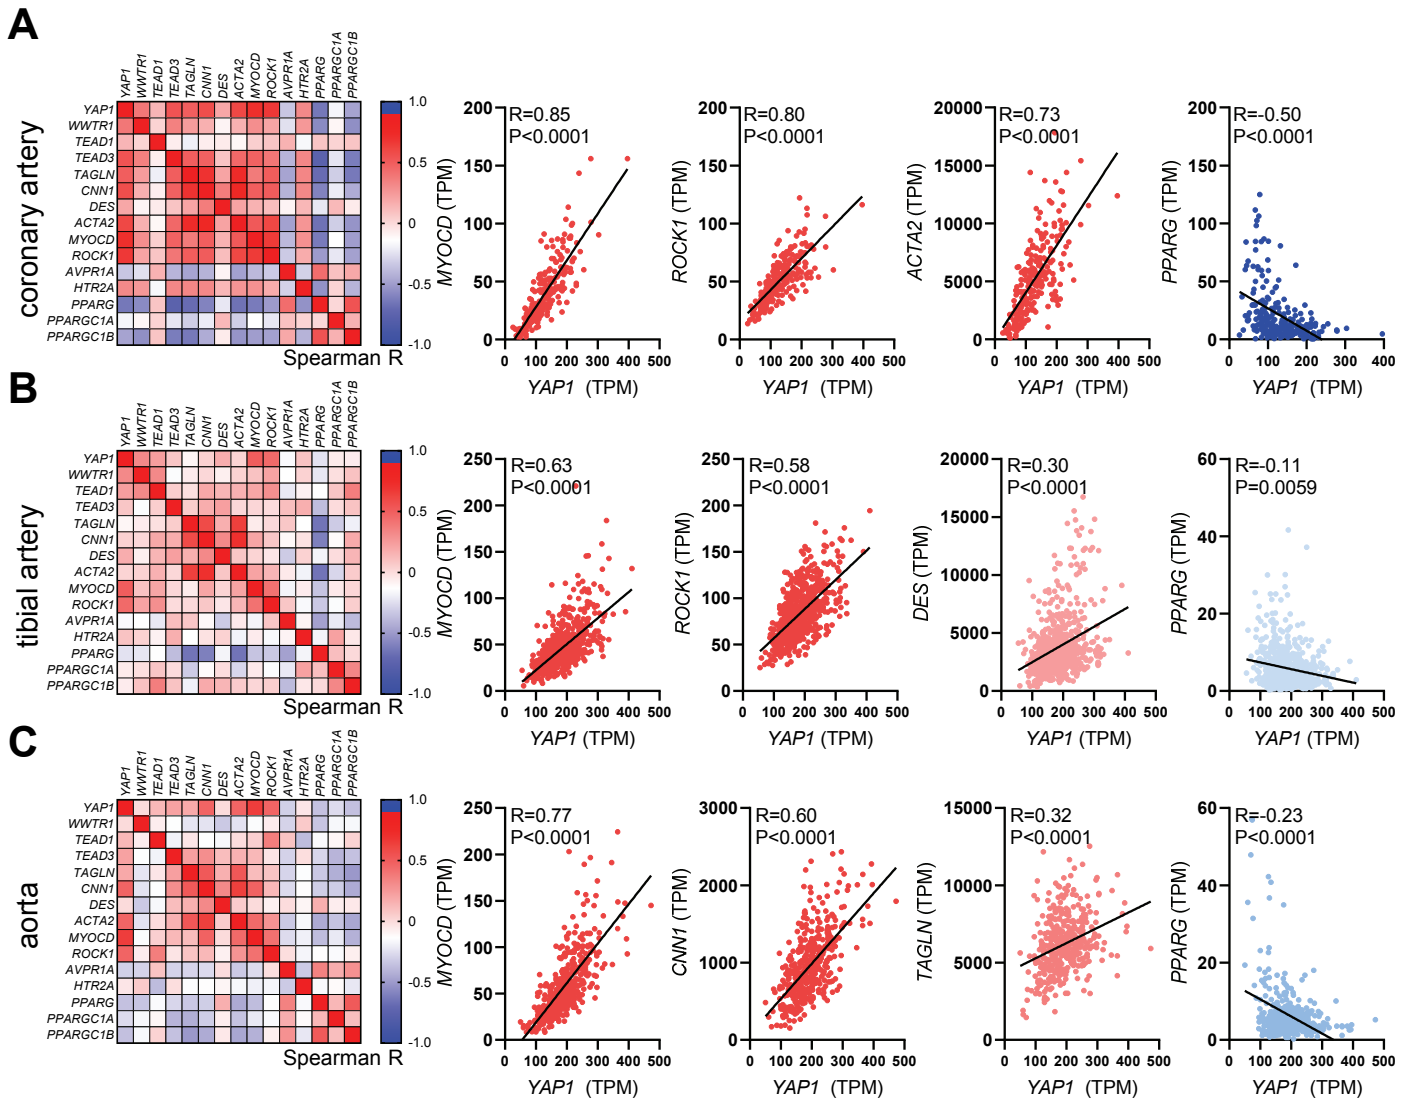

**Figure S2. Similar relationships between *YAP1* and *WWTR1* (TAZ) and smooth muscle markers in human and mouse arteries.** Downloaded RNA-sequencing data from the GTEXPortal.org followed by correlation analyses. The heatmaps to the left (A-C) are visual representation of the Spearman R-value that resulted from different correlations, ranging from -1 (blue) to +1 (red). Each matrix represents correlation between *YAP1* (First row/column), *WWTR1* (second row/column), and several other transcripts that we identified in the mouse in different vascular beds (A) coronary artery (B) tibial artery (C) aorta. To the right of each matrix, *YAP1* exemplary correlations for human coronary artery ( $n=240$ ), tibial artery ( $n=663$ ), and aorta ( $n=432$ ) are shown. P-values and Spearman R coefficients are specified in the latter panels. TPM: transcripts per million.

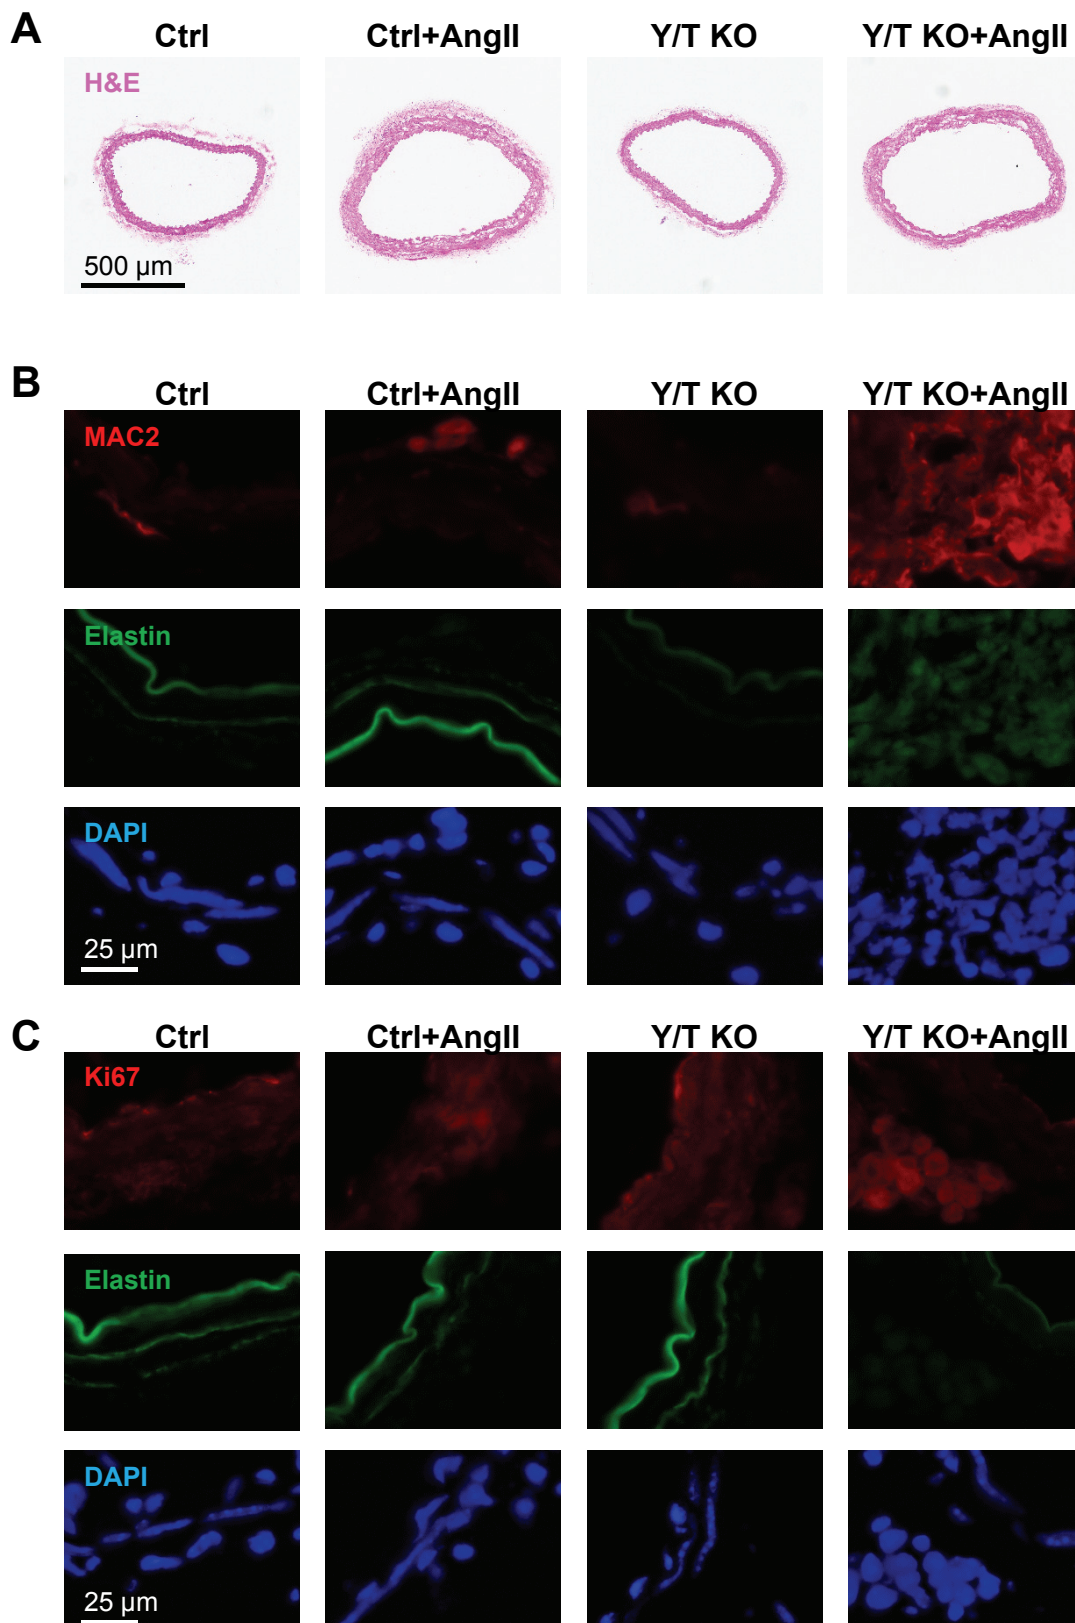

**Figure S3. Histological images of aortae and fluorescence images of mesenteric arteries.** (A) Hematoxylin and eosin staining (H&E) of aortae from control (Ctrl) and Y/T KO with or without angiotensin II (AngII). (B) Cryosections of mesenteric arteries stained for MAC2 (red), elastin (green), and DAPI (blue). Images represent individual fluorophores (from Figure 7). (C) Cryosections of mesenteric arteries stained for Ki67 (red), elastin (green), and DAPI (blue). Images represent individual fluorophores (from Figure 7).

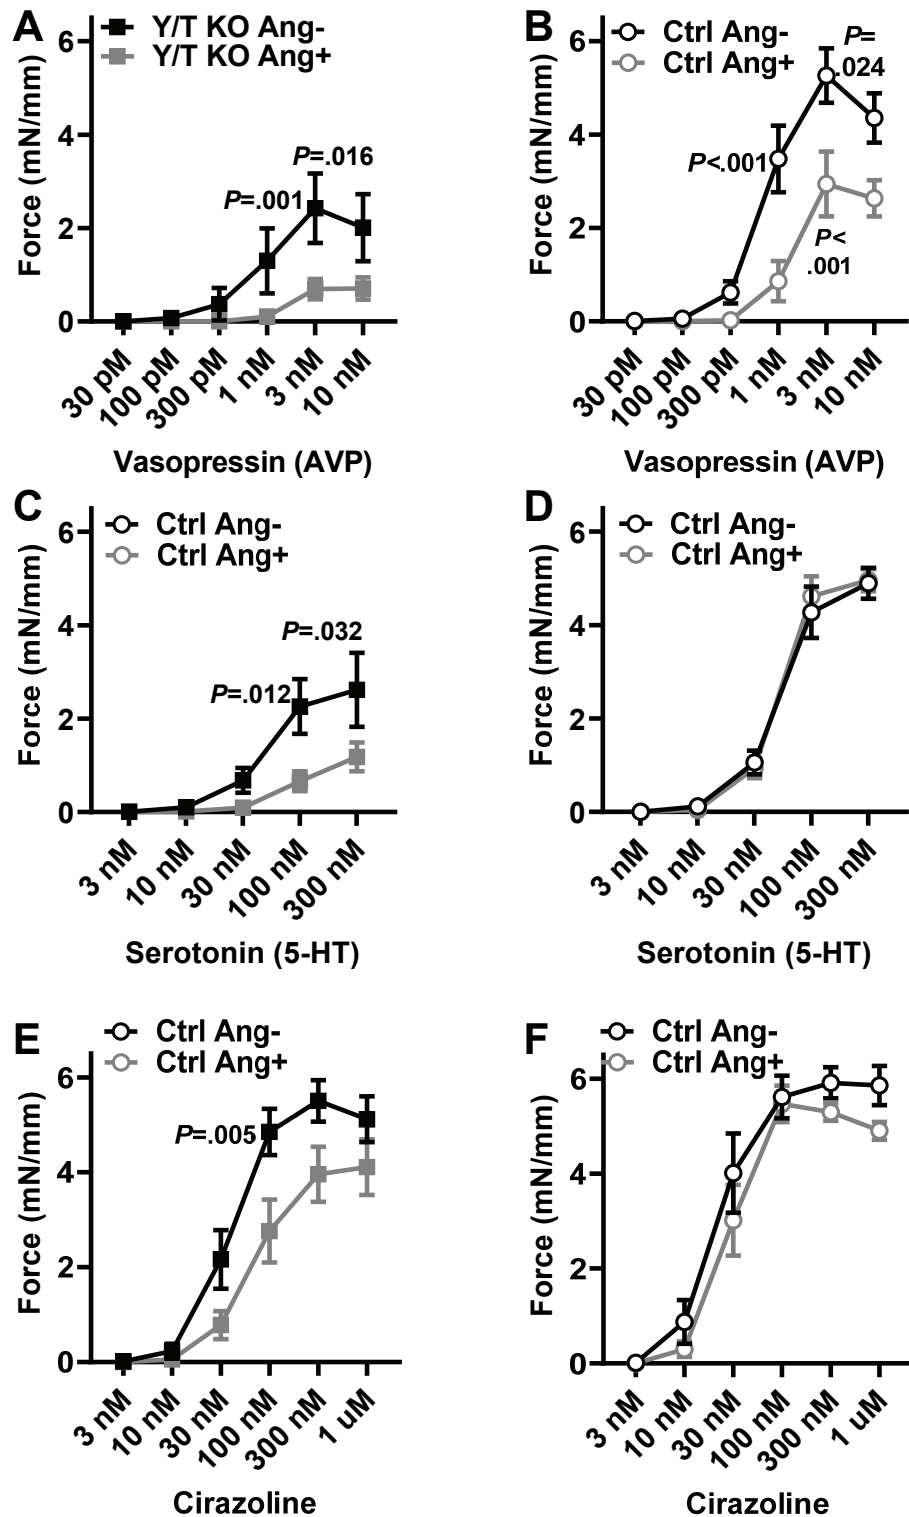

**Figure S4. Angiotensin II treatment results in further attenuation of contractile responses in Y/T KO tail arteries.** Tail arteries were mounted in a wire myography. The black curves that represent Y/T KO Ang- and Ctrl Ang- are the same data from (Figure 2A-C). Force measurements were integrated over 7 minutes and normalized to the preparations' length. (A) Dose response curve for vasopressin of Y/T KO mice with angiotensin ( $n=8$ ) and without ( $n=8$ ). (B) Dose response curve for vasopressin of control mice with angiotensin ( $n=7$ ) and without ( $n=7$ ). (C) Dose response curve for serotonin of Y/T KO mice with angiotensin ( $n=8$ ) and without ( $n=9$ ). (D) Dose response curve for serotonin of control mice with angiotensin ( $n=8$ ) and without ( $n=9$ ). (E) Dose response curve for cirazoline of Y/T KO mice with angiotensin ( $n=8$ ) and without ( $n=9$ ). (F) Dose response curve for cirazoline of control mice with angiotensin ( $n=9$ ) and without ( $n=9$ ). All data are presented as mean  $\pm$ SEM.

## Major Resources Table

In order to allow validation and replication of experiments, all essential research materials listed in the Methods should be included in the Major Resources Table below. Authors are encouraged to use public repositories for protocols, data, code, and other materials and provide persistent identifiers and/or links to repositories when available.

### Animals (in vivo studies)

| Species | Vendor or Source       | Background Strain                                                            | Sex  | Persistent ID / URL |
|---------|------------------------|------------------------------------------------------------------------------|------|---------------------|
| Mouse   | The Jackson Laboratory | <i>Wwtr1<sup>tm1Hmc</sup> Yap1<sup>tm1Hmc</sup>/WranJ</i>                    | Male |                     |
| Mouse   | The Jackson Laboratory | <i>Myh11-Cre/ERT2</i>                                                        | Male |                     |
| Mouse   | The Jackson Laboratory | <i>B6.129(Cg)-Gt(ROSA)<br/>26Sor<sup>tm4(ACTB-tdTomato,-EGFP)Luo/J</sup></i> | Male |                     |

### Antibodies

| Target antigen      | Vendor or Source | Catalog # | Working concentration      | Lot # (preferred but not required) | Persistent ID / URL |
|---------------------|------------------|-----------|----------------------------|------------------------------------|---------------------|
| Ki67                | Abcam            | #ab15580  | 10 ug/ ml (IF)             |                                    |                     |
| YAP/TAZ             | Cell signaling   | #8418     | 1:200 (IF),<br>1:1000 (WB) |                                    |                     |
| MAC2 (galectin3)    | Cedarlane        | #CL8942AP | 5 ug/ ml (IF)              |                                    |                     |
| SM-MHC              | Abcam            | #ab53219  | 1:1000 (WB)                |                                    |                     |
| $\alpha$ -actin     | Sigma-Aldrich    | #A5228    | 1 ug/ ml (WB)              |                                    |                     |
| PPAR $\gamma$       | Cell Signaling   | #2443     | 1:500 (WB)                 |                                    |                     |
| ROCK1               | Cell Signaling   | #4035     | 1:1000 (WB)                |                                    |                     |
| C/EBP $\alpha$      | Cell Signaling   | #2295     | 1:1000 (WB)                |                                    |                     |
| C/EBP $\beta$ (LAP) | Cell Signaling   | #3087     | 1:1000 (WB)                |                                    |                     |
| Histone H3          | Cell Signaling   | #4499     | 1:1000 (WB)                |                                    |                     |

### Data & Code Availability

| Description             | Source / Repository                                                                                 | Persistent ID / URL |
|-------------------------|-----------------------------------------------------------------------------------------------------|---------------------|
| RNA-sequencing datasets | Gene Expression Omnibus repository,<br>accession code: GSE180631<br>And as supplementary excel file |                     |

### Other

| Description                         | Source / Repository | Catalog #    |
|-------------------------------------|---------------------|--------------|
| Osmotic mini-pumps                  | Alzet               | Model 2004   |
| Elastic connective tissue stain kit | Abcam               | #ab150667    |
| Oil red                             | Sigma               | #O0525       |
| Harris hematoxylin                  | HistoLab            | #01800       |
| Alizarin red                        | Sigma-Aldrich       | A5533-25G    |
| [Arg <sup>8</sup> ] Vasopressin     | Tocris              | #2935        |
| Serotonin hydrogen maleate          | Sigma-Aldrich       | #H4511-500MG |
| Cirazoline hydrochloride            | Tocris              | #0888        |

DOI [to be added]

|                                    |                          |            |
|------------------------------------|--------------------------|------------|
| U 46619                            | Tocris                   | #1932      |
| Angiotensin II                     | Tocris                   | #1158      |
| DMEM Ham's F12                     | VWR                      | #L0092-500 |
| 2% dialyzed fetal bovine serum     | Thermo fisher scientific | #A3382001  |
| Penicillin/streptomycin            | Biochrom                 | #A2212     |
| Insulin                            | Sigma-Aldrich            | #I-5500    |
| Revert 700 Total Protein Stain kit | LI-COR                   | #926-11010 |
| Nuclear Extraction Kit             | Abcam                    | #ab221978  |
| miRNeasy Mini Kit                  | Qiagen                   | # 217084   |
| RNeasy Mini kit                    | Qiagen                   | #74104     |
|                                    |                          |            |
